# Supplementary material for: Functional In Vivo Delivery of Multiplexed Anti-HIV-1 siRNAs via a Chemically Synthesized Aptamer With a Sticky Bridge
Source: PubMed Central journal article supplement — Mol Ther. 2012 Nov 20;21(1):192–200. doi: 10.1038/mt.2012.226 (PMC3538316; doi:10.1038/mt.2012.226), 2012-11-20

Figure S1

# HIV-1 challenge assay (CEM and IIIB): p24 level and target gene silencing

**A**

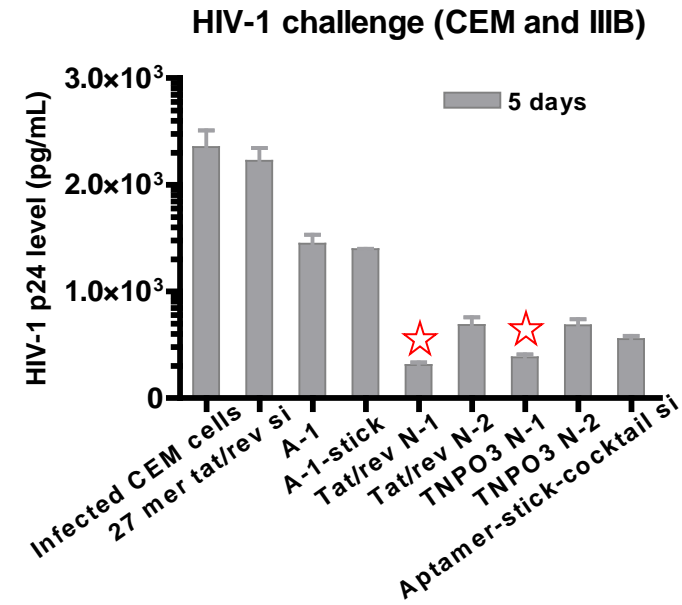

**B**

Target gene silencing (HIV-1 infected CEM cells)

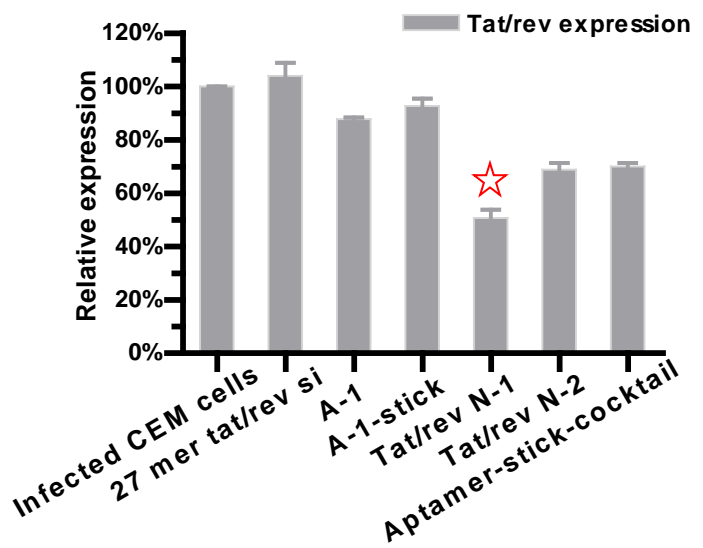

**C**

Target gene silencing (HIV-1 infected CEM cells)

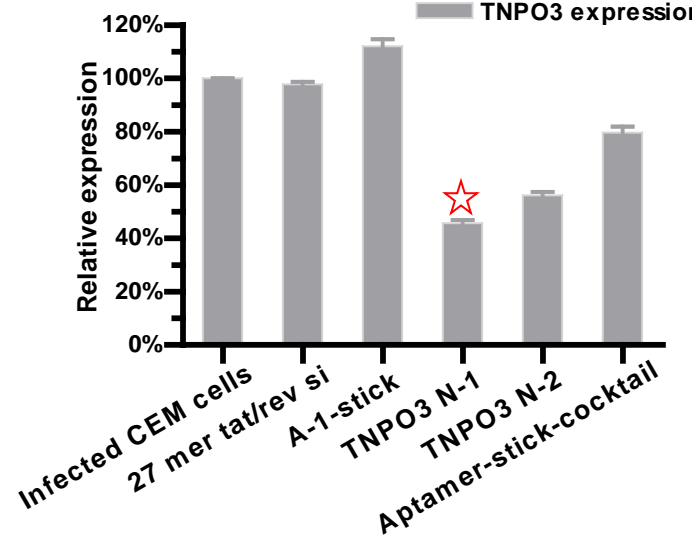

Supplement: mt2012226x1.pdf [file mt2012226x1.pdf]
