# Supplementary material for: Functional In Vivo Delivery of Multiplexed Anti-HIV-1 siRNAs via a Chemically Synthesized Aptamer With a Sticky Bridge
Source: PubMed Central journal article supplement — Mol Ther. 2012 Nov 20;21(1):192–200. doi: 10.1038/mt.2012.226 (PMC3538316; doi:10.1038/mt.2012.226), 2012-11-20
Supplement: mt2012226x2.pdf [file mt2012226x2.pdf]

Figure S2

## 5'- RACE PCR to verify the cleavage of *tat/rev* mRNA & TNPO3 mRNA

A

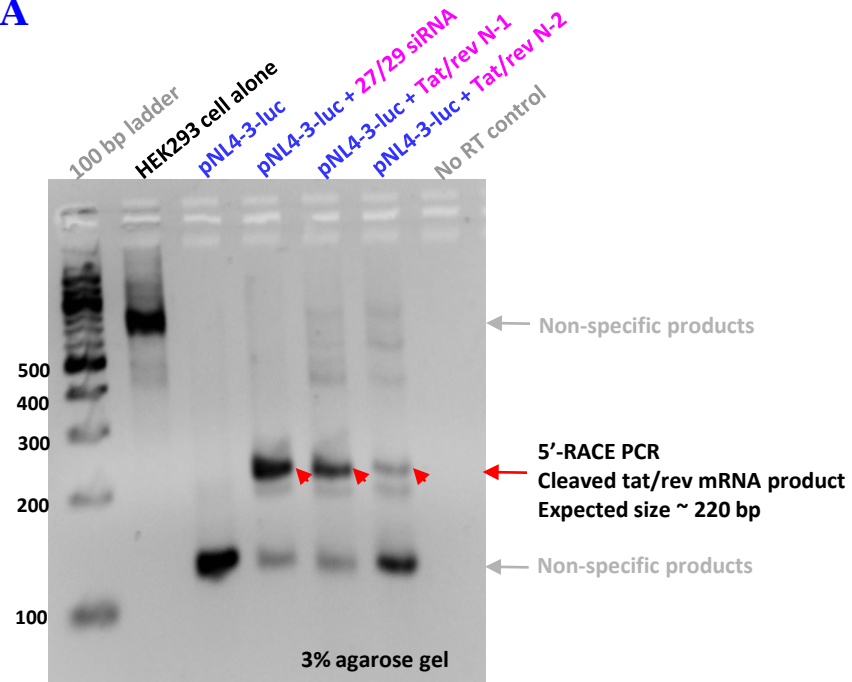

# B. mRNA cleavage site from A-1-stick-tat/rev siRNA conjugate (TA clone)

| Targeted sequence                                                                                                                                                                                                         | mRNA cleavage site                                                                                                                                                              |
|---------------------------------------------------------------------------------------------------------------------------------------------------------------------------------------------------------------------------|---------------------------------------------------------------------------------------------------------------------------------------------------------------------------------|
| <p>5'-GCGGAGACAGCGACGAAGAGCTCATCAGA -3'</p> <p><b>Tat/rev N-1</b></p> <p>3'-CAUUGAAGUCUUCUGCG XXXXX CGCCUCUGUCGUCUUCUCGAGUAGU -5'</p> <p>5'-GCGGAGACAGCGACGAAGAGCUCUCAUUA UU-3'</p> <p>AS</p> <p>S</p> <p>Dicer entry</p> | <p>5'-GCGGAGACAGCGACGAAGAGCTCATCAGA -3'</p> <p>5'-AGCGACGAAGAGCUCUCAUUA UU-3'</p> <p>3'-UGUCGUCUUCUCGAGUAGU 5'</p> <p>10 nt</p>                                                 |
| <p><b>Tat/rev N-2</b></p> <p>3'-CAUUGAAGUCUUCUGCG XXXXX ACUACUCGAGAAGCAGCGACAGAGGCG -5'</p> <p>5'-UGAUGAGCUCUUCGUCGUCUCUCCGC UU -3'</p> <p>AS</p> <p>S</p>                                                                | <p>5'-GAGACAGCGACGAAGAGC TCA -3'</p> <p>3'-GC CUCUCUGCGUCGCUUCUCGA -5'</p> <p>10 nt</p> <p>5'-GGAGACAGCGACGAAGAGC UC -3'</p> <p>3'-CG CCUCUCUGCGUCGCUUCUCG -5'</p> <p>10 nt</p> |

Figure S2

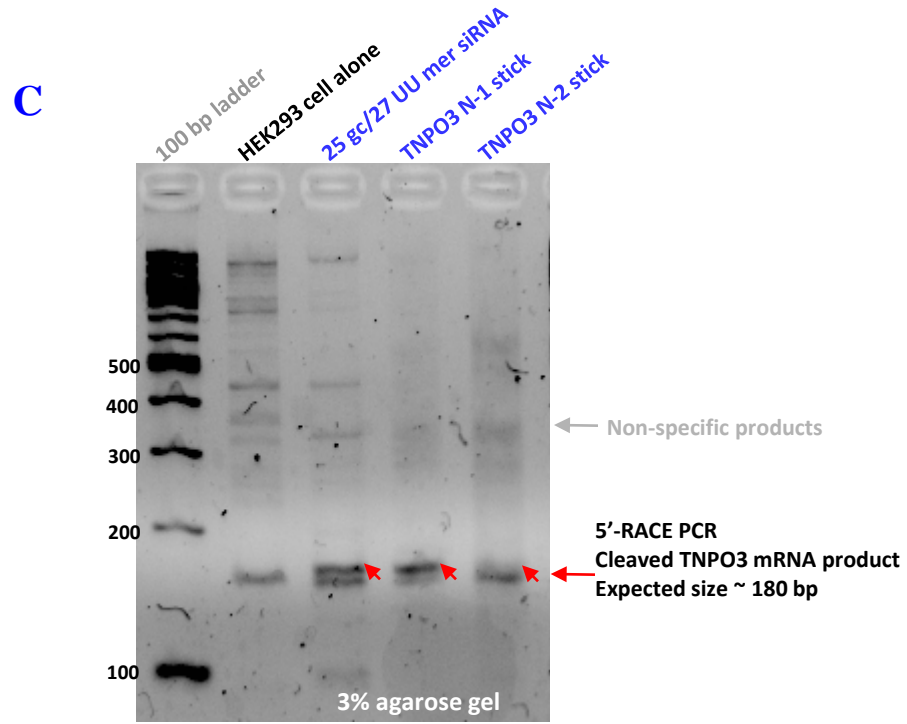

# D. mRNA cleavage site from A-1-stick-TNPO3 siRNA conjugate (TA clone)

| Targeted sequence                                                                                                                                                                                                        | mRNA cleavage site                                                                                                                                                      |
|--------------------------------------------------------------------------------------------------------------------------------------------------------------------------------------------------------------------------|-------------------------------------------------------------------------------------------------------------------------------------------------------------------------|
| <p>5'- GGAGCAAAGCCGACATTGCAGCTCGTGTACCAGGC -3'</p> <p><b>TNPO3 N-1</b></p> <p>3'-CAUGUACAGCUACCG-5' (Linker 7-C3, 16 nt stick)</p> <p>5'-CAAAGCCGACAUUCGAGCUCGUGUAUU-3'</p> <p>AS (red), S (blue)</p> <p>Dicer entry</p> | <p>mRNA cleavage site</p> <p>GGAGCAAAGCCGACATTGCAGCTCGTGTACCAGGC</p> <p>5'-CGACAUUGCAGCUCGUGUAUU-3'</p> <p>3'-CGGCUGUAACGUCGAGCACAU-5'</p> <p>10 nt</p>                 |
| <p><b>TNPO3 N-2</b></p> <p>3'-CAUGUACAGCUACCG-5' (Linker 7-C3, 16 nt stick)</p> <p>5'-GCCUGGUACACGAGCUGCAAUGUCG-3'</p> <p>AS (red), S (blue)</p>                                                                         | <p>5'-UGCAGCUCGUGUACCAGGC-3'</p> <p>3'-UAACGUCGAGCACAUUGGUCCG-5'</p> <p>10 nt</p> <p>5'-AUUGCAGCUCGUGUACCAGGC-3'</p> <p>3'-UGUAACGUCGAGCACAUUGGUCCG-5'</p> <p>10 nt</p> |
