# Supplementary material for: Functional In Vivo Delivery of Multiplexed Anti-HIV-1 siRNAs via a Chemically Synthesized Aptamer With a Sticky Bridge
Source: PubMed Central journal article supplement — Mol Ther. 2012 Nov 20;21(1):192–200. doi: 10.1038/mt.2012.226 (PMC3538316; doi:10.1038/mt.2012.226), 2012-11-20
Supplement: mt2012226x4.pdf [file mt2012226x4.pdf]

Table S1A:

## First treatment

## Viral Loads

| Treatment week                        | -3      | -2       | 1        | 2        | 3        | 4        | 5        | 1        | 2        | 3        | 4        |          |
|---------------------------------------|---------|----------|----------|----------|----------|----------|----------|----------|----------|----------|----------|----------|
| Week post infection                   | 4       | 5        | 7        | 8        | 9        | 10       | 11       | 12       | 13       | 14       | 15       |          |
| Non-infected                          | J411    | <60      | <60      | <60      | <60      | <60      | <60      | <60      | <60      | <60      | <60      |          |
|                                       | J412    |          | <60      | <60      | <60      | <60      | <60      | <60      | <60      | <60      | <60      |          |
|                                       | average | <60      | <60      | <60      | <60      | <60      | <60      | <60      | <60      | <60      | <60      |          |
| Non-treated                           | J377    | 4.71E+04 | 2.11E+05 | 1.15E+05 | 8.12E+04 | 7.08E+04 | 5.55E+05 | 6.61E+04 | 3.68E+04 | 2.76E+04 | 6.64E+04 | 4.01E+03 |
|                                       | J378    | 1.95E+05 | 4.22E+04 | 2.89E+05 | 2.45E+05 | 1.51E+05 | 1.66E+05 | 7.62E+04 | 2.60E+04 | 5.19E+04 | 1.54E+05 | 8.01E+03 |
|                                       | J379    | 3.13E+05 | 1.43E+05 | 1.88E+05 | 7.08E+04 | 1.78E+04 | 1.61E+06 | *        | 2.32E+04 | 8.75E+03 | 6.19E+04 | 4.68E+03 |
|                                       | J380    | 2.40E+04 | 4.86E+05 | 1.39E+05 | 5.01E+04 | 1.15E+05 | 1.60E+04 | 4.02E+04 | 1.65E+03 | 4.12E+04 | 1.90E+05 | 1.09E+05 |
|                                       | J381    | 9.91E+04 | 2.91E+05 | 2.35E+04 | 1.07E+05 | 5.01E+04 | 1.00E+00 | 2.54E+05 | 9.87E+02 | 2.07E+04 | 2.87E+04 | 1.73E+04 |
|                                       | J383    | 3.14E+04 | 1.85E+05 | 1.57E+05 | 5.76E+04 | 5.76E+04 | 9.12E+05 | *        | 1.17E+04 | 2.32E+04 | 4.07E+04 | 3.19E+03 |
|                                       | J389    | 4.11E+04 | 1.43E+05 | 1.77E+05 | 6.61E+04 | 8.70E+04 | *        | 5.55E+05 | 5.82E+04 | 3.28E+04 | 1.34E+05 | 4.03E+04 |
|                                       | J390    | 2.74E+04 | 2.11E+05 | 1.39E+05 | 5.01E+04 | 6.61E+04 | 2.91E+03 | 1.98E+04 | 1.31E+04 | 2.60E+04 | 6.64E+04 | 1.87E+04 |
|                                       | average | 9.72E+04 | 2.14E+05 | 1.53E+05 | 9.09E+04 | 7.69E+04 | 4.66E+05 | 1.69E+05 | 2.14E+04 | 2.90E+04 | 9.26E+04 | 2.57E+04 |
|                                       | log ave | 6.28E+04 | 1.78E+05 | 1.29E+05 | 7.85E+04 | 6.61E+04 | 2.51E+04 | 9.09E+04 | 1.16E+04 | 2.60E+04 | 7.70E+04 | 1.27E+04 |
| Naked siRNAs (cocktails)              | J431    | 1.60E+04 | 7.52E+04 | *        | 3.55E+04 | 1.07E+05 | 3.55E+04 | 4.79E+03 | 9.81E+03 | 3.89E+04 | 1.34E+05 | 2.18E+05 |
|                                       | J432    | 2.56E+04 | 2.11E+05 | 1.23E+04 | 4.50E+03 | 4.08E+04 | 4.50E+03 | 2.19E+03 | 3.11E+03 | 1.74E+04 | 1.43E+05 | 1.27E+04 |
|                                       | J433    | 1.83E+04 | 4.86E+05 | 7.52E+03 | 3.55E+04 | 4.37E+04 | 3.55E+04 | 2.12E+04 | 1.31E+04 | 1.85E+04 | 3.54E+04 | 4.33E+03 |
|                                       | J434    | 5.79E+03 | 1.63E+05 | 7.99E+03 | 2.70E+04 | 1.45E+04 | 2.70E+04 | 3.61E+03 | 9.32E+02 | 7.36E+03 | 7.64E+04 | 3.73E+04 |
|                                       | J435    | 1.30E+05 | 3.71E+04 | 2.72E+04 | 7.80E+03 | 6.35E+03 | 7.80E+03 | 1.98E+04 | 2.08E+03 | 3.70E+03 | 3.79E+04 | 5.04E+02 |
|                                       | average | 3.91E+04 | 1.94E+05 | 1.37E+04 | 2.21E+04 | 4.25E+04 | 2.21E+04 | 1.03E+04 | 5.80E+03 | 1.72E+04 | 8.53E+04 | 5.46E+04 |
|                                       | log ave | 2.24E+04 | 1.36E+05 | 1.19E+04 | 1.64E+04 | 2.81E+04 | 1.64E+04 | 6.92E+03 | 3.78E+03 | 1.28E+04 | 7.22E+04 | 1.18E+04 |
| A-1-stick-cocktailed siRNA conjugates | J472    | 1.82E+05 | 1.43E+05 | 1.00E+00 | 2.42E+03 | 3.41E+03 | 8.45E+03 | 1.60E+04 | 1.75E+03 | 1.00E+00 | 1.87E+03 | 4.34E+03 |
|                                       | J473    | 1.13E+05 | 1.98E+05 | 1.00E+00 | 2.64E+02 |
|                                       | J474    | 2.40E+04 | 1.98E+05 | 9.03E+03 | 1.60E+03 | 1.00E+00 | 1.00E+00 | 1.00E+00 | 1.00E+00 | 1.00E+00 | 1.00E+00 | 1.51E+02 |
|                                       | J475    | 8.65E+04 | 2.25E+05 | 1.35E+03 | 1.00E+00 | 1.00E+00 | 3.87E+03 | 5.92E+03 | 1.00E+00 | 2.34E+03 | 4.99E+03 | 5.35E+03 |
|                                       | J481    | 3.36E+04 | 1.85E+05 | 1.00E+00 | 2.64E+02 | 2.14E+02 |
|                                       | J482    | 1.21E+05 | 4.22E+04 | 1.00E+00 | 1.00E+00 | 1.00E+00 | 1.00E+00 | 1.00E+00 | 1.00E+00 | 1.24E+03 | 1.75E+03 | 1.42E+04 |
|                                       | J483    | 1.70E+05 | 1.43E+05 | 4.08E+03 | 3.66E+03 | 1.00E+00 | 8.18E+04 | 4.16E+03 | 7.36E+03 | 9.26E+03 | 4.04E+03 | 9.36E+03 |
|                                       | J484    | 4.40E+04 | 5.82E+04 | 1.63E+03 | 2.11E+03 | 1.00E+00 | 1.00E+00 | 1.00E+00 | 1.00E+00 | 1.17E+03 | 4.99E+03 | 8.73E+03 |
|                                       | average | 9.69E+04 | 1.49E+05 | 2.01E+03 | 1.22E+03 | 4.28E+02 | 1.18E+04 | 3.26E+03 | 1.14E+03 | 1.75E+03 | 2.24E+03 | 5.33E+03 |
|                                       | log ave | 7.75E+04 | 1.30E+05 | 5.48E+01 | 4.83E+01 | 2.76E+00 | 3.58E+01 | 2.81E+01 | 7.74E+00 | 4.87E+01 | 3.11E+02 | 1.97E+03 |

\*Sample did not have enough plasma for QRTPCR

# Table S1B:

## Re-treatment

## Viral Loads

Non-treated

| Treatment week      | 11       | 12.5 | 13.5 | 14       | 14.5     | 15       | 16       | 17       | 18       | 19       |
|---------------------|----------|------|------|----------|----------|----------|----------|----------|----------|----------|
| Week post infection | 22       | 23.5 | 24.5 | 25       | 25.5     | 26       | 27       | 28       | 29       | 30       |
| J377                | 7.28E+03 |      |      | Dead     |          |          |          |          |          |          |
| J378                | 3.99E+03 |      |      | 3.02E+03 | 1.67E+03 | 1.82E+03 | 9.89E+01 | 1.87E+02 | 4.53E+02 | 3.95E+02 |
| J379                | 1.23E+04 |      |      | 9.12E+03 | 4.63E+02 | 6.36E+01 | 4.29E+02 | 1.63E+02 | 3.69E+02 | 1.00E+00 |
| J380                | 7.64E+02 |      |      | 5.97E+02 | 1.09E+03 | 6.90E+02 | 1.86E+03 | 2.02E+03 | 4.88E+03 | 2.65E+03 |
| J381                | 1.29E+03 |      |      | 1.00E+03 | 1.35E+03 | 9.30E+02 | 1.00E+00 | 1.00E+00 | 1.00E+00 | 1.00E+00 |
| J383                | 5.25E+02 |      |      | 4.13E+02 | 6.26E+01 | 1.00E+00 | 1.00E+00 | 1.00E+00 | 1.00E+00 | 1.00E+00 |
| J389                |          |      |      |          |          |          |          |          |          |          |
| J390                |          |      |      |          |          |          |          |          |          |          |

A-1-stick-cocktailed siRNA conjugates

|      |          |  |  |          |          |          |          |          |          |          |
|------|----------|--|--|----------|----------|----------|----------|----------|----------|----------|
| J472 | 8.88E+02 |  |  | 1.00E+00 |
| J473 | 1.39E+03 |  |  | 1.00E+00 |
| J474 | 7.09E+02 |  |  | not used |          |          |          |          |          |          |
| J475 | 3.43E+03 |  |  | 1.00E+00 | 1.00E+00 | 1.00E+00 | 1.15E+02 | 1.00E+00 | 1.00E+00 | 1.00E+00 |
| J481 | 1.75E+03 |  |  | 1.00E+00 |
| J482 | 5.66E+02 |  |  | not used |          |          |          |          |          |          |
| J483 | 1.00E+00 |  |  | not used |          |          |          |          |          |          |
| J484 | 3.60E+02 |  |  | not used |          |          |          |          |          |          |

## Table S1C:

Viral Loads – First Treatment

| <b>Comparison</b>       |    |                                            | <b>p-value</b> |
|-------------------------|----|--------------------------------------------|----------------|
| Uninfected Control      | vs | Naked cocktailed DsiRNA                    | P = 0.0107     |
| Uninfected Control      | vs | Non-Treated                                | P = 0.0010     |
| Uninfected Control      | vs | Aptamer-stick-cocktailed DsiRNA conjugates | P = 0.0001     |
| Naked cocktailed DsiRNA | vs | Non-Treated                                | P = 0.0102     |
| Naked cocktailed DsiRNA | vs | Aptamer-stick-cocktailed DsiRNA conjugates | P = 0.1059     |
| Non-Treated             | vs | Aptamer-stick-cocktailed DsiRNA conjugates | P = 0.0030     |

Overall p-value = 0.0005

## Table S1D:

Viral Loads –Re-treatment

| <b>Comparison</b> |    |                                            | <b>p-value</b> |
|-------------------|----|--------------------------------------------|----------------|
| Non-Treated       | vs | Aptamer-stick-cocktailed DsiRNA conjugates | P = 0.0143     |

Overall p-value = 0.0143
