# Supplementary material for: Functional In Vivo Delivery of Multiplexed Anti-HIV-1 siRNAs via a Chemically Synthesized Aptamer With a Sticky Bridge
Source: PubMed Central journal article supplement — Mol Ther. 2012 Nov 20;21(1):192–200. doi: 10.1038/mt.2012.226 (PMC3538316; doi:10.1038/mt.2012.226), 2012-11-20
Supplement: mt2012226x6.pdf [file mt2012226x6.pdf]

# Table S3: Mutation assay: deep sequence

❖ Sample A: Control original NL4-3 viral total RNA

❖ Sample B: aptamer-stick-siRNA treated mouse J483

When condition: threshold = 1, true (1), mutation >1%

Tat/rev domain (yellow): 4 mutation above 1%

HIV-1 envelop signal domain (grey): 1 mutation above 1%

Gp120 domain (pink) : 6 mutation above 2%

Gp41 domain (blue): 5 mutation above 1%

| pos  | Ref | B Mutation | A reference | Mutation% | Low | Fold | mutation_coverage | Quality | balance | threshold | indel | True/False |
|------|-----|------------|-------------|-----------|-----|------|-------------------|---------|---------|-----------|-------|------------|
| 5821 | G   | T          | A           | 2.03%     | 1   | 3.77 | 25406             | high    | yes     | 1         | no    | 1          |
| 5837 | C   | T          | A           | 2.40%     | 1   | 2.02 | 33366             | high    | yes     | 1         | no    | 1          |
| 6078 | A   | T          | C           | 4.10%     | 1   | 3.97 | 357               | high    | yes     | 1         | no    | 1          |
| 6138 | C   | A          | T           | 1.90%     | 1   | 2.15 | 103               | high    | yes     | 1         | no    | 1          |
| 6232 | G   | T          | A           | 2.70%     | 1   | 2.54 | 241               | high    | yes     | 1         | no    | 1          |
| 6625 | G   | C          | T           | 3.10%     | 1   | 2.38 | 1897              | high    | yes     | 1         | no    | 1          |
| 6757 | T   | G          | A           | 2.29%     | 1   | 2.26 | 2135              | high    | yes     | 1         | no    | 1          |
| 6874 | G   | T          | A           | 2.76%     | 1   | 2.90 | 3458              | high    | yes     | 1         | no    | 1          |
| 6921 | C   | T          | A           | 5.72%     | 1   | 4.31 | 6342              | high    | yes     | 1         | no    | 1          |
| 7410 | C   | T          | A           | 2.91%     | 1   | 2.64 | 1174              | high    | yes     | 1         | no    | 1          |
| 7651 | G   | A          | T           | 2.11%     | 1   | 2.51 | 528               | high    | yes     | 1         | no    | 1          |
| 7829 | G   | A          | T           | 1.88%     | 1   | 2.76 | 367               | high    | yes     | 1         | no    | 1          |
| 8026 | C   | A          | T           | 2.05%     | 1   | 2.52 | 1585              | high    | yes     | 1         | no    | 1          |
| 8035 | T   | C          | G           | 4.99%     | 1   | 3.77 | 4397              | high    | yes     | 1         | no    | 1          |
| 8041 | T   | A          | G           | 10.34%    | 1   | 4.31 | 9547              | high    | yes     | 1         | no    | 1          |
| 8291 | G   | T          | A           | 1.70%     | 1   | 2.97 | 2903              | high    | yes     | 1         | no    | 1          |

Tat/rev site I domain:  
5982-6008

Gp120 domain:  
6320...7747 nt

Gp41 domain:  
7796...8782 nt
