# Supplementary figures and images for: Functional In Vivo Delivery of Multiplexed Anti-HIV-1 siRNAs via a Chemically Synthesized Aptamer With a Sticky Bridge
Source: PubMed Central journal article supplement — Mol Ther. 2012 Nov 20;21(1):192–200. doi: 10.1038/mt.2012.226 (PMC3538316; doi:10.1038/mt.2012.226), 2012-11-20

Figure S3

### Stability of aptamer-stick-siRNA conjugate in mouse serum

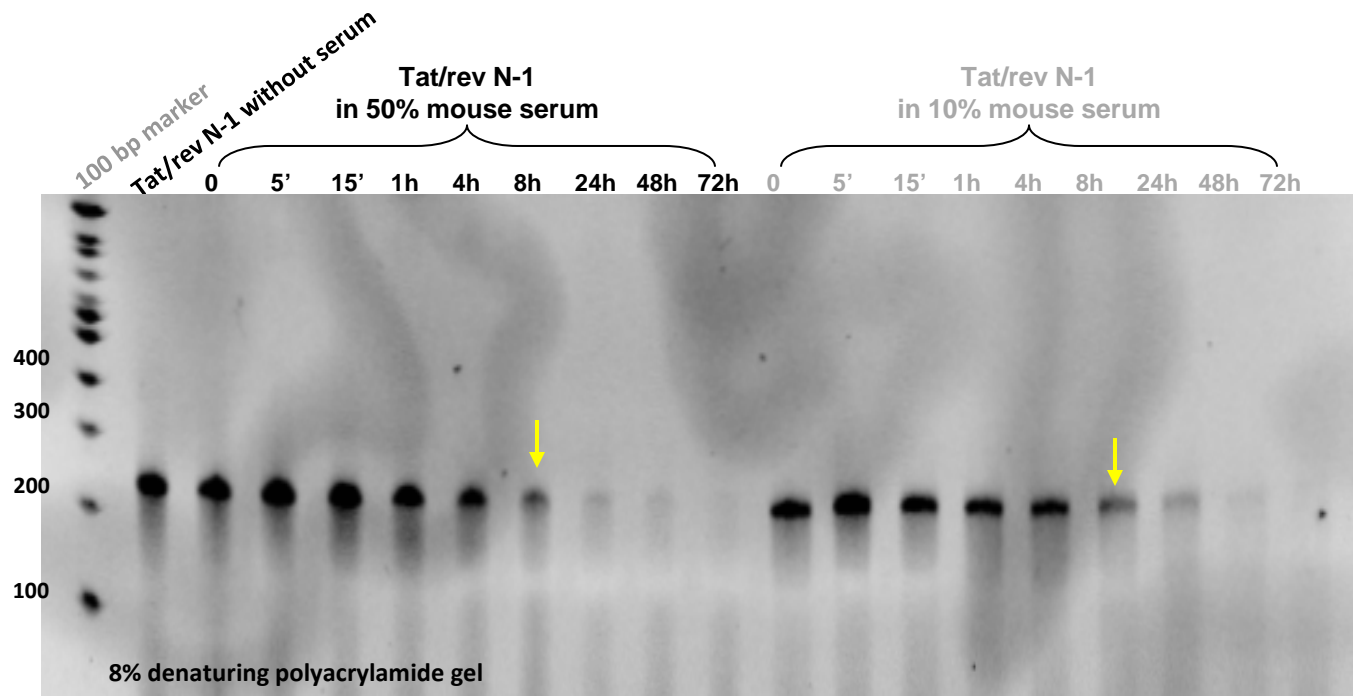

Supplement: mt2012226x3.pdf [file mt2012226x3.pdf]
